# Supplementary material
Source: Springer Nature journal article supplement (https://www.springermedizin.de/resource/supplementary/12889_2012_4839_MOESM3_ESM.pdf/9494658)

**Factors affecting pathway****PATHWAY****Target beneficiaries**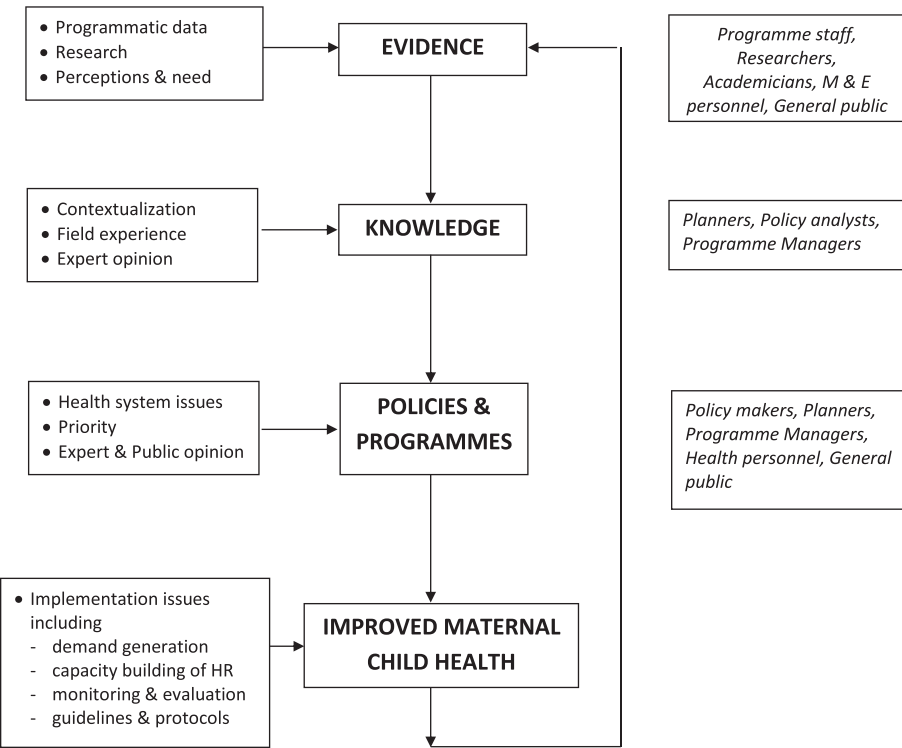

Supplement: MOESM3 [file 9494658]
